# Supplementary material for: Acceptability and Usability of Continuous Glucose Monitoring Systems in Older Adults Aged 75 Years and Older with Diabetes
Source: Research Square preprint supplement (doi:10.21203/rs.3.rs-6857580/v1), 2025-06-20
Supplement: Supplementary file 1 [file c7497e01f98d9a484806629d.docx]

**Supplementary Appendix: Semi-Structured Interview Questions**

**Section I. Questions on Acceptability**

1. Did you feel comfortable using the continuous glucose monitoring (CGM) device?
2. What efforts were required in your daily life while wearing and using the CGM device?
3. What expectations or concerns do you have about the use of CGM?
4. In what ways did using the CGM device help you?
5. How do you understand the main purpose and function of the CGM device?
6. Do you feel confident in your ability to use the CGM device independently?
7. Was there anything you had to give up or adjust in order to use the CGM device?

**Section II. Questions on Usability**

1. What aspects of using the CGM device did you find difficult or inconvenient?
2. Did you experience any difficulties when scanning the sensor with your smartphone?
3. Did you feel any physical discomfort or anxiety while using the CGM device? If so, can you describe the specific situations in which you felt this way?
4. In your opinion, what aspects of the CGM system should be improved to make it more suitable for older adults aged 75 and over?
5. (If applicable) What kind of support do you receive from your caregiver in managing your diabetes?

**Closing Prompt:**
If there is anything else you would like to share about your experience using the continuous glucose monitoring device, please feel free to do so.
